# Supplementary material
Source: MDPI journal article supplement (https://www.mdpi.com/2227-9717/12/3/509)
Supplement: s1 [file s1]

**Table S1:** Relative humidity of the eleven saturated salt solutions at different temperatures

| Salt name           | Molecular Formula                 | Temperature (°C) |        |
|---------------------|-----------------------------------|------------------|--------|
|                     |                                   | 50               | 70     |
| Lithium chloride    | LiCl                              | 0.1003           | 0.0916 |
| Potassium Acetate   | CH <sub>3</sub> COOK              | 0.1893           | 0.1621 |
| Magnesium chloride  | MgCL <sub>2</sub>                 | 0.3038           | 0.2877 |
| Potassium carbonate | K <sub>2</sub> CO <sub>3</sub>    | 0.4269           | 0.4158 |
| magnesium nitrate   | Mg(NO <sub>3</sub> ) <sub>2</sub> | 0.4885           | 0.4580 |
| Sodium nitrate      | NaNO <sub>3</sub>                 | 0.5881           | 0.5436 |
| Potassium iodide    | KI                                | 0.6453           | 0.6162 |
| sodium chloride     | NaCl                              | 0.7178           | 0.6887 |
| Potassium chloride  | KCl                               | 0.7768           | 0.7270 |
| Potassium nitrate   | KNO <sub>3</sub>                  | 0.8663           | 0.8289 |
| Potassium sulphate  | K <sub>2</sub> SO <sub>4</sub>    | 0.9617           | 0.9522 |
